# Supplementary material
Source: HighWire-hosted journal article supplement (https://bmjopen.bmj.com/content/10/9/e036563)
Supplement: inline-supplementary-material-1 [file inline-supplementary-material-1.pdf]

**Supplemental material for manuscript: Study protocol for the international  
Systemic Lupus Erythematosus Prospective Observational Cohort Study  
(SPOCS): understanding lupus and the role of type I interferon gene  
signature**

Edward R. Hammond, Raj Tummala, Anna Berglind, Farhat Syed, Xia Wang, Barnabas  
Desta, Henk Nab

**Supplementary Table.** Ethics Committees/Institutional Review Boards (IRB)/Independent Ethics Committees (IEC) for the Systemic Lupus Erythematosus Prospective Observational Cohort Study (SPOCS)

| Country        | Central IRB/IEC                                                                              |
|----------------|----------------------------------------------------------------------------------------------|
| Spain          | CEIC Hospital Universitario 12 de Octubre                                                    |
| Spain          | CEIC Hospital Virgen de la Arrixaca                                                          |
| Italy          | Comitato Etico - Azienda Ospedaliera Universitaria Policlinico Sant'Orsola Malpighi          |
| France         | Comité de Protection de Personnes Ile de France VI                                           |
| Spain          | Hospital del Mar                                                                             |
| Australia      | Monash Health Human Research Ethics Committee                                                |
| United Kingdom | West Midlands - Edgbaston Research Ethics Committee                                          |
| USA            | Advarra                                                                                      |
| Canada         | Advarra Canada                                                                               |
| USA            | Schulman Associates IRB                                                                      |
| Country        | Local IRB/IEC                                                                                |
| United Kingdom | Aintree University Hospitals NHS Foundation Trust                                            |
| Germany        | Ärzttekammer Nordrhein                                                                       |
| United States  | BRANY IRB                                                                                    |
| United Kingdom | Brighton & Sussex University Hospital NHS Trust                                              |
| Spain          | CEIC Autonómico de Andalucía                                                                 |
| Spain          | CEIC de Galicia                                                                              |
| Spain          | CEIC Euskadi                                                                                 |
| Spain          | CEIC Fundació Puigvert                                                                       |
| Spain          | CEIC Hospital Clínico de Salamanca                                                           |
| Spain          | CEIC Hospital Universitario 12 de Octubre                                                    |
| Spain          | CEIC Hospital Universitario Río Ortega                                                       |
| Spain          | CEIC Hospital Universitario San Cecilio                                                      |
| Australia      | Central Adelaide Local Health Network Incorporated operating as The Queen Elizabeth Hospital |
| Canada         | Centre intégré de santé et de services sociaux de la Montérégie-Centre Québec                |
| Canada         | Centre intégré de santé et de services sociaux de la Montérégie-Centre Québec                |
| Canada         | Centre intégré de santé et de services sociaux de la Montérégie-Centre Québec                |
| Germany        | Charité Berlin                                                                               |
| Italy          | Comitato Etico Area Vasta Nord Ovest                                                         |
| Italy          | Comitato Etico Catania 1                                                                     |
| Italy          | Comitato Etico della Provincia Monza Brianza                                                 |
| Italy          | Comitato Etico dell'Università Cattolica del Sacro Cuore e annesso Policlinico "A. Gemelli"  |
| Italy          | Comitato Etico di Area Vasta Centro                                                          |
| Italy          | Comitato Etico Interaziendale Città della Salute Torino                                      |
| Italy          | Comitato Etico IRCCS Ospedale S. Raffaele di Milano                                          |
| Italy          | Comitato Etico Milano Area 2                                                                 |
| Italy          | Comitato Etico per le Province di L'Aquila e Teramo                                          |
| Italy          | Comitato Etico Provinciale della Provincia di Brescia                                        |

|                |                                                                                           |
|----------------|-------------------------------------------------------------------------------------------|
| Italy          | Comitato Etico Regionale della Liguria                                                    |
| Canada         | Conjoint Health Research Ethics Board                                                     |
| Germany        | Ethik-Kommission bei der Medizinischen Fakultät der Universität<br>Würzburg-LEC           |
| Germany        | Ethikkommission der Ärztekammer Hamburg                                                   |
| Germany        | Ethik-Kommission der Medizinischen Fakultät der LMU München                               |
| Germany        | Ethikkommission der Medizinischen Fakultät der TU Dresden                                 |
| Germany        | Ethik-Kommission der Medizinischen Fakultät Heidelberg- LEC                               |
| Germany        | Ethik-Kommission der Medizinischen Fakultät Heidelberg- LEC                               |
| Germany        | Ethik-Kommission des Fachbereichs Medizin der Goethe-Universität Frankfurt<br>am Main     |
| Germany        | Ethik-Kommission der Medizinischen Fakultät der Georg-August-Universität<br>Göttingen-LEC |
| United Kingdom | Guy's and St Thomas' NHS Foundation Trust                                                 |
| Canada         | Hamilton Integrated Research Ethics Board                                                 |
| Canada         | Health Research Ethics Board                                                              |
| Canada         | Health Research Ethics Board of Alberta                                                   |
| United States  | Henry Ford Health Systems IRB                                                             |
| Spain          | Hospital Clinic de Barcelona                                                              |
| Spain          | Hospital de la Santa Creu i Sant Pau                                                      |
| Spain          | Hospital general de Catalunya                                                             |
| Spain          | Hospital Universitari Vall d'Hebron                                                       |
| Australia      | Hunter New England Local Health District (RGO)                                            |
| Italy          | ISTITUTO CLINICO HUMANITAS                                                                |
| United States  | Johns Hopkins University IRB                                                              |
| United States  | Loma Linda University Adventist Health Institutional Review Board                         |
| Canada         | Nova Scotia Health Authority Research Ethics Board                                        |
| Canada         | Ottawa Health Science Network Research Ethics Board                                       |
| United Kingdom | R&D - Doncaster & Bassetlaw Hospitals NHS Foundation Trust                                |
| United Kingdom | R&D - Maidstone and Tunbridge Wells NHS Trust                                             |
| United Kingdom | R&D - Plymouth Hospitals NHS Trust                                                        |
| United Kingdom | R&D - The Princess Alexandra Hospital NHS Trust                                           |
| United Kingdom | R&D Coventry and Warwickshire Partnership NHS Trust                                       |
| United Kingdom | R&D North Staffordshire Combined Healthcare NHS Trust                                     |
| United Kingdom | R&D UCLH NHS Foundation Trust                                                             |
| Spain          | RA Andalucía                                                                              |
| Spain          | RA Cantabria                                                                              |
| Spain          | RA Castilla y León                                                                        |
| Spain          | RA Cataluña                                                                               |
| Australia      | Royal Brisbane & Women's Hospital RGO                                                     |
| United Kingdom | Royal United Hospitals Bath NHS Foundation Trust                                          |
| United States  | Rush University Medical Center                                                            |
| Italy          | Seconda Università degli Studi di Napoli                                                  |
| United Kingdom | Sheffield Teaching Hospitals NHS Foundation Trust                                         |
| Australia      | South Western Sydney Local Health District (RGO)                                          |
| Australia      | St Vincent's Hospital (Melbourne) HREC D (RGO)                                            |
| Australia      | The Canberra Hospital (RGO)                                                               |
| Canada         | University Health Network Research Ethics Board                                           |

|                |                                                               |
|----------------|---------------------------------------------------------------|
| Canada         | University of British Columbia Clinical Research Ethics Board |
| United Kingdom | Warrington and Halton NHS Foundation Trust                    |
| Australia      | Western Health - RGO                                          |
| Canada         | Western University Office of Research Ethics Board            |
| United Kingdom | Wrightington Wigan and Leigh NHS Foundation Trust             |
